# Supplementary material
Source: publisher figshare collection journal article supplement (https://asha.figshare.com/articles/dataset/_/21809772)
Supplement: Supplementary file 1 [file 1]

**Supplemental Material S2.** Summary of studies focused on prosody perception in hearing aid and cochlear implant users.

| Authors, Year          | Sample size                                        | Age range                        | Study language | Type of auditory prosthesis  | Method                                                                                                                                                 | Types of prosody | Result                                                                                                                                                                                                                                                                      |
|------------------------|----------------------------------------------------|----------------------------------|----------------|------------------------------|--------------------------------------------------------------------------------------------------------------------------------------------------------|------------------|-----------------------------------------------------------------------------------------------------------------------------------------------------------------------------------------------------------------------------------------------------------------------------|
| Luo et al., 2007       | 8 adult NH subjects<br>8 adult CI users            | 22–40 years<br>41–73 years       | English        | CI                           | Behavioral measures:<br>The House Ear Institute emotional speech database (HEI-ESD)                                                                    | Affective        | Although CI performance remained lower than that of NH individuals, CI users were able to use some of prosodic cues (amplitude and duration) to obtain moderate levels of vocal emotion perception. Removing the amplitude variations worsened the performance of CI users. |
| Meister et al., 2009   | 12 CI recipients<br>12 NH listener                 | 38–75 years<br>34–68 years       | German         | CI                           | Behavioral measures:<br>question/statement test, a sentence stress test, and a speaker gender test                                                     | linguistic       | The identification of sentence stress, questions/statements, and speaker gender in CI users were qualitatively similar to the NH group. In contrast, most CI recipients had poor performance quantitatively, particularly in sentence stress test.                          |
| Straatman et al., 2010 | 14 NH children<br>19 children with bimodal fitting | 6.8–16.7 years<br>6.0–19.8 years | Dutch          | CI alone and bimodal hearing | Behavioral measures:<br>- Discrimination of pitch movements in bisyllabic non-words<br>- Discrimination between questions and affirmations             | linguistic       | Compared to using CI-only, bimodal fitting improved the performance of children in discriminating F0 excursions and identifying questions vs. affirmations. However, even with a hearing aid, children need exaggerated F0 contour.                                         |
| Meister et al., 2011   | 13 CI recipients<br>13 NH listeners                | 19–81 years<br>18–73 years       | German         | CI                           | Behavioral measures:<br>discrimination and identification task for stress-based sentences (Natural utterances and artificial manipulations of stimuli) | linguistic       | Discrimination and stress identification based on F0 and intensity had been degraded in CI users compared to NH group. This effect was not shown for duration cues.                                                                                                         |
| Most et al., 2011      | 23 adults                                          | 17–65 years                      | English        | CI alone and bimodal hearing | Behavioral measures:<br>- Intonation test<br>- Syllable stress test<br>- Word emphasis test                                                            | linguistic       | Bimodal fitting showed better score in all three tests compared to CI-only condition, suggesting HA in non-implanted ear provides better low-frequency acoustic                                                                                                             |

|                          |                                                                                                      |                    |                                    |                                  |                                                                                                                                                                                                                                  |            |                                                                                                                                                                                                                                                                                                                                                                                                               |
|--------------------------|------------------------------------------------------------------------------------------------------|--------------------|------------------------------------|----------------------------------|----------------------------------------------------------------------------------------------------------------------------------------------------------------------------------------------------------------------------------|------------|---------------------------------------------------------------------------------------------------------------------------------------------------------------------------------------------------------------------------------------------------------------------------------------------------------------------------------------------------------------------------------------------------------------|
|                          |                                                                                                      |                    |                                    |                                  |                                                                                                                                                                                                                                  |            | hearing which is required for prosody perception.                                                                                                                                                                                                                                                                                                                                                             |
| Cullington & Zeng, 2011  | 13 adults with CI<br>13 children with bimodal fitting                                                | 18 years and above | English                            | Bilateral CI and bimodal hearing | Behavioral measures:<br>- Hearing in Noise Test (HINT)<br>- Montreal Battery of Evaluation of Amusia<br>- Aprosodia Battery<br>- Talker identification                                                                           | Affective  | The mean score of affective prosody discrimination was not significantly different between the bimodal and bilateral groups; however, the bimodal group had a better performance. Such finding was also observed for all the other tests.                                                                                                                                                                     |
| Most & Michaelis, 2012   | 26 children with HL<br>14 children with NH who mostly wear HA                                        | 4.0–6.6 years      | Nonsense sentence "bado mino gana" | HA                               | Behavioral measure:<br>The Emotion Identification Test (EIT) under three presentation conditions: auditory, visual, and auditory–visual                                                                                          | Affective  | The corrected mean percent scores were higher for children with NH compared to children with HL in each of the three conditions. However, children with HA performed better in auditory–visual condition than auditory alone condition, suggesting benefiting from auditory cues provided by HA.                                                                                                              |
| Agrawal et al., 2012     | 28 NH listeners                                                                                      | 25–55 years        | German                             | Simulating CI processing         | Behavioral measures:<br>reaction time and accuracy rates for neutral sentences and vocoded stimuli which had been simulated two CI speech-coding strategies (PACE and ACE)<br>Electrophysiological test:<br>An N100-P200 complex | Affective  | Faster responses, higher identification rates, and larger P200 amplitude were detected for original stimuli. For vocoded stimuli, better recognition of happy and angry sentences was demonstrated in comparison to natural ones especially for PACE strategy.                                                                                                                                                |
| Agrawal et al., 2013     | 20 CI users (2 subgroups based on coding strategy: MP3000 and ACE)<br>20 normal-hearing participants | 25–60 years        | German                             | CI                               | Behavioral measures:<br>Reaction time and accuracy rates for sentences with neutral, happy and angry prosody<br>Electrophysiological tests:<br>Recording N100-P200 complex, Time-Frequency measure                               | Affective  | CI users had difficulty in prosody recognition, as demonstrated by lower accuracy, longer reaction time, prolong ERP latencies, and reduced amplitude. However, MP3000 strategy was better than ACE one on happy emotion. In addition, time-frequency results supported the behavioral and ERP findings by showing power increase of Theta and Gamma bands for MP3000 strategy than ACE on emotional stimuli. |
| Hegarty & Faulkner, 2013 | 9 children with HL                                                                                   | 7.4–14.6 years     | English                            | CI alone and bimodal condition   | Behavioral measures:<br>- Discrimination test for bisyllabic word with                                                                                                                                                           | linguistic | In both conditions (CI alone and bimodal fitting), better perception of prosodic patterns when children were presented                                                                                                                                                                                                                                                                                        |

|                              |                                                                                     |                                                                              |           |    |                                                                                                                                                                                                           |                          |                                                                                                                                                                                                                                                                                                                                                                                                                                                                                |
|------------------------------|-------------------------------------------------------------------------------------|------------------------------------------------------------------------------|-----------|----|-----------------------------------------------------------------------------------------------------------------------------------------------------------------------------------------------------------|--------------------------|--------------------------------------------------------------------------------------------------------------------------------------------------------------------------------------------------------------------------------------------------------------------------------------------------------------------------------------------------------------------------------------------------------------------------------------------------------------------------------|
|                              |                                                                                     |                                                                              |           |    | manipulated F0 and amplitude<br>- Focus sentence test                                                                                                                                                     |                          | with natural speech stimuli compared to sentences with pitch manipulations. Also, there was no bimodal advantage for stress and intonation perception compared to CI alone.                                                                                                                                                                                                                                                                                                    |
| Van Zyl & Hanekom, 2013      | 10 adult CI user<br>10 adults with NH                                               | 21–70 years                                                                  | Afrikaans | CI | Behavioral measures:<br>- question/statement distinction<br>- The discrimination of attitude as sarcastic or sincere<br>- Vowel recognition task Under quiet and noise                                    | linguistic               | No significant difference was observed for certain/hesitant task and vowel recognition task between adults with NH and CI users, suggesting CI gives access to durational cues even in noise condition. But CI recipients performed worse in question/ statement discrimination as this task was highly dependent on F0 variation, which were degraded in CI technology especially in the presence of noise.                                                                   |
| Kalathottukaren et al., 2015 | 12 adult CI users<br>15 NH adults (normative data)                                  | 25–78 years<br>23–57 years                                                   | English   | CI | Behavioral measures:<br>1- Profiling Elements of Prosody in Speech-Communication (PEPS-C)<br>2- DANVA 2 (diagnostic analysis of non-verbal accuracy 2) 3- MBEA (Montreal battery of evaluation of amusia) | Affective and linguistic | Lower score of CI users in turn-end, affect, music, and contrastive stress reception subtests was demonstrated, suggesting degraded pitch perception in electrical hearing. However, they showed no difference in chunking reception subtest.                                                                                                                                                                                                                                  |
| Chatterjee et al., 2015      | 31 children with NH<br>36 children with CI<br>10 adults with NH<br>9 adults with CI | 6.3–18.7 years<br>6.8–18.4 years<br>mean age = 23.9 years<br>27.3–69.8 years | English   | CI | Behavioral measures:<br>- 12 sentences from the HINT database spoken with five emotions<br>- CI simulated of the same sentences                                                                           | Affective                | The mean score of emotion identification for CI children and CI adults were as good as adults with NH listening to a CI simulated speech. However, NH children showed significantly poorer performance in response to CI-simulated speech. Taken together, this finding showed that not only CI technology but also sufficiently developed cognitive system in CI adults and learned adaptive strategies in CI children can help them to extract emotion from degraded speech. |

|                      |                                                                             |                                                    |           |                                        |                                                                                                                                                                                                                                                         |           |                                                                                                                                                                                                                                                                |
|----------------------|-----------------------------------------------------------------------------|----------------------------------------------------|-----------|----------------------------------------|---------------------------------------------------------------------------------------------------------------------------------------------------------------------------------------------------------------------------------------------------------|-----------|----------------------------------------------------------------------------------------------------------------------------------------------------------------------------------------------------------------------------------------------------------------|
| Schmidt et al., 2016 | 23 older adults with mild to moderate HL<br><br>22 NH adults                | 65–82 years                                        | German    | Bilateral HA for at least 2 years      | Behavioral measure:<br>Rating level of emotion dimensions arousal (calm vs. aroused) and valence (positive vs. negative attitude) by using utterances from an authentic and affectively-colored German conversational speech corpus                     | Affective | No significant difference was detected between hearing aid users and their NH peers in the perception of both valence and arousal emotions. However, for arousal dimension, HA users were more sensitive to intensity differences than NH adults.              |
| Goy et al., 2016     | 11 older adults with mild to severe HL<br><br>27 NH younger adults          | mean age = 77.2 years<br><br>mean age = 18.3 years | English   | HA with a median of 5 years experience | Behavioral measure:<br>word-recognition measure and emotion-identification measure for Toronto Emotional Speech Set                                                                                                                                     | Affective | Older adults with HL performed worse on both word recognition and emotion identification when they were unaided. In the aided condition, their performance improved significantly for word recognition without much benefit for emotion identification.        |
| Goy et al., 2017     | Using simulated materials instead of recruiting people with HL and HA users | -                                                  | English   | Simulating HA processing               | Behavioral measure:<br>Analyzing and comparing the acoustic cues used in emotional sentences of Toronto Emotional Speech Set after being manipulated to simulate sloping bilateral HL and HA outputs in different compressions (linear, slow, and fast) | Affective | Acoustic analysis of received sounds in the ear canal of a mannequin showed that hearing aid processing made emotions less distinguishable in aspect of intensity variation and spectral cues. The hearing aid effect varied according to the type of emotion. |
| Arefi et al., 2017   | 40 NH young adult subjects                                                  | 20–35 years                                        | Persian   | Simulating HA processing               | Behavioral measure:<br>Emotion recognition task before and after hearing aid compression simulation using sentences from Persian emotional speech database (ESD)                                                                                        | Affective | Depending on the type of emotion, recognition of Fear, sad, angry, and happy was reduced following simulating HA amplitude compression.                                                                                                                        |
| Laugen et al., 2017  | 130 children with NH                                                        | 4–5 years                                          | Norwegian | HA                                     | Behavioral measure:                                                                                                                                                                                                                                     | Affective | Children with HA performed similarly to the normal hearing children, despite                                                                                                                                                                                   |

|                           |                                                                                                                           |                                                                         |         |              |                                                                                                                                                                                                                       |           |                                                                                                                                                                                                                                                                                                                                                                                                                                                                                                                |
|---------------------------|---------------------------------------------------------------------------------------------------------------------------|-------------------------------------------------------------------------|---------|--------------|-----------------------------------------------------------------------------------------------------------------------------------------------------------------------------------------------------------------------|-----------|----------------------------------------------------------------------------------------------------------------------------------------------------------------------------------------------------------------------------------------------------------------------------------------------------------------------------------------------------------------------------------------------------------------------------------------------------------------------------------------------------------------|
|                           | 35 preschool children with mild to severe HL                                                                              |                                                                         |         |              | The test of emotion comprehension                                                                                                                                                                                     |           | having lower vocabulary scores. Also, parents of hearing-impaired children were more accurate in the estimations of their children's emotional and cognitive development                                                                                                                                                                                                                                                                                                                                       |
| Christensen et al., 2019  | 22 adults with mild to severe HL<br>30 NH adults                                                                          | 22–74 years<br>21–75 years                                              | English | Bilateral HA | Behavioral measure:<br>Evaluating accuracy rate and reaction time for emotion recognition of 12 sentences from the HINT database recorded in different emotions                                                       | Affective | In addition to age-related declines in emotion recognition, hearing loss further impacted the ability to perceive emotions, which was showed by reduced accuracy and increased reaction time.                                                                                                                                                                                                                                                                                                                  |
| Cannon & Chatterjee, 2019 | 19 school-aged children with mild to moderate HL<br>20 children with NH<br>11 NH young adults                             | 8–14 years<br>6–17 years<br>9–24 years                                  | English | HA           | Behavioral measure:<br>Emotion recognition using 12 sentences from the HINT database which had been produced in a child- and adult-directed manner                                                                    | Affective | Children with mild to moderate hearing loss had similar accuracy and reaction time on emotion recognition tasks using either child- or adult- directed manner, although all participants performed better with child-directed materials. However, in children with HL, linguistic ability had strong role in emotion recognition. Also, they showed that NH adults outperformed both groups of children, attributed to significant effect of developmental age on performance in the emotion recognition task. |
| Singh et al., 2019        | 12 NH adults<br>10 adults with HL but without (unaided condition)<br>10 hearing-impaired adults with HA (aided condition) | mean age = 66.8 years<br>mean age = 73.5 years<br>mean age = 73.5 years | English | Bilateral HA | Behavioral measures:<br>- 16-item version of the self-report questionnaire (the Emotional Communication in Hearing Questionnaire or EMO-CHeQ)<br>- Emotion-identification task under audio and audiovisual conditions | Affective | Both the HI and HA groups showed greater vocal emotion communication handicap on the EMO-CHeQ compared to NH group. However, the groups of aided and unaided listeners reported similar degrees of handicap. On the emotion-identification task, the HI and HA group performed worse than to the NH group in audio alone condition, with no group differences were observed for audiovisual condition.                                                                                                         |

|                        |                                                                                 |                                      |        |              |                                                                                                                                                                                                       |           |                                                                                                                                                                                                                                                                    |
|------------------------|---------------------------------------------------------------------------------|--------------------------------------|--------|--------------|-------------------------------------------------------------------------------------------------------------------------------------------------------------------------------------------------------|-----------|--------------------------------------------------------------------------------------------------------------------------------------------------------------------------------------------------------------------------------------------------------------------|
| Legris et al.,<br>2021 | 29 subjects<br>with mild to<br>moderate<br>presbycusis<br><br>29 NH<br>subjects | 50–90<br>years<br><br>50–75<br>years | French | Bilateral HA | Behavioral measures:<br>- Montreal Affective<br>Voice test (MAV)<br>- The Profile of Emotional<br>Competence questionnaire<br>* Comparing patients'<br>scores before and after<br>hearing aid fitting | Affective | Despite the use of HA, the presbycusis<br>individuals' score remained poorer<br>compared to normal subjects. Based on<br>the MAV results, the impaired auditory<br>emotion perception of presbycusis<br>patients was correlated with pure-tone<br>average and age. |
|------------------------|---------------------------------------------------------------------------------|--------------------------------------|--------|--------------|-------------------------------------------------------------------------------------------------------------------------------------------------------------------------------------------------------|-----------|--------------------------------------------------------------------------------------------------------------------------------------------------------------------------------------------------------------------------------------------------------------------|

*Note.* HL = hearing loss; NH = normal hearing; HA = hearing aid; CI = cochlear implant.
